# Supplementary material for: Hydrogen Impurity Defects in Rutile TiO2
Source: PubMed Central journal article supplement (PMC4667266; doi:10.1038/srep17634), 2015-12-02
Supplement: srep17634-s1.pdf [file srep17634-s1.pdf]

# Supplemental Information

## Hydrogen Impurity Defects in Rutile TiO<sub>2</sub>

Li-Bin Mo,<sup>1</sup> Yu Wang,<sup>2</sup> Yang Bai,<sup>1</sup> Qing-Yun Xiang,<sup>1</sup> Qun Li,<sup>1</sup> Wen-Qing Yao,<sup>3</sup> Jia-Ou Wang,<sup>4</sup> Kurash Ibrahim,<sup>4</sup> Huan-Hua Wang,<sup>4</sup> Cai-Hua Wan<sup>5</sup> and Jiang-Li Cao<sup>1, \*</sup>

<sup>1</sup>Institute of Advanced Materials and Technology, University of Science and Technology  
Beijing, Beijing 100083, China

<sup>2</sup>Department of Applied Physics, Hong Kong Polytechnic University, Hong Kong, China

<sup>3</sup>Department of Chemistry, Tsinghua University, Beijing 100084, China

<sup>4</sup>Institute of High Energy Physics, Chinese Academy of Sciences, Beijing 100049, China

<sup>5</sup>Institute of Physics, Chinese Academy of Sciences, Beijing 100190, China

\*Author to whom correspondence should be addressed. Email: [perov@sina.com](mailto:perov@sina.com)

Fig. S1 Hall effect measurements of rutile TiO<sub>2</sub> single crystals at low temperatures. (a) Vacuum-annealed TiO<sub>2</sub>, (b) gas-hydrogenated TiO<sub>2</sub>, and (c) atom-hydrogenated TiO<sub>2</sub>. The carrier concentration  $n$ , the resistivity  $\rho$  and the carrier mobility  $\mu$  were obtained through linear fitting between the measured Hall resistance and the applied magnetic field.

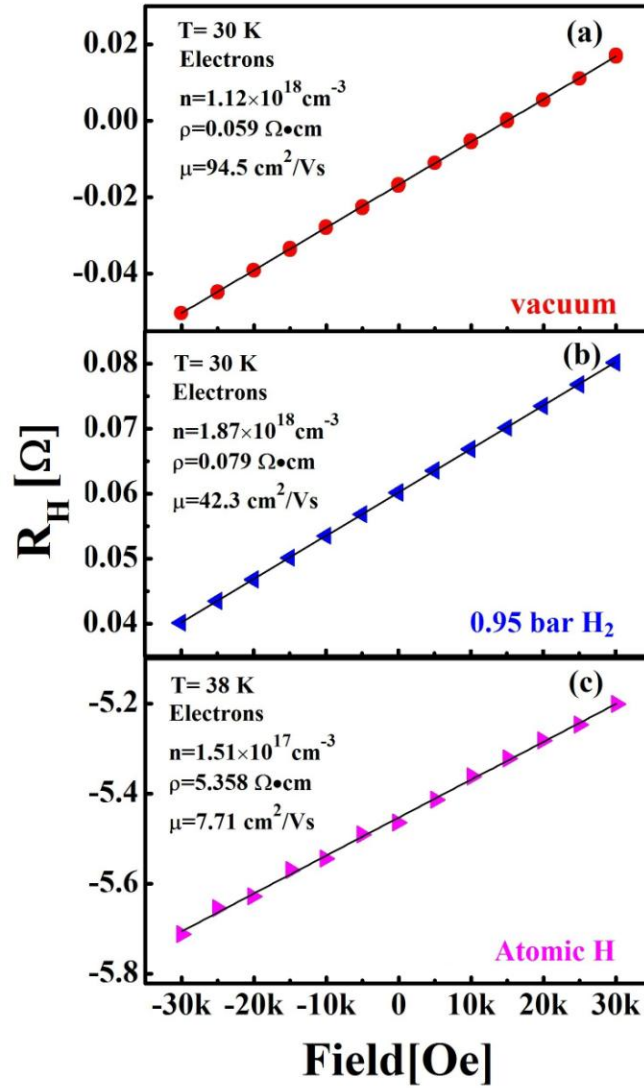

Fig. S2 XRD patterns of rutile  $\text{TiO}_2$  samples. The  $\text{TiO}_2$  single crystals were ground into powders for the XRD measurements.

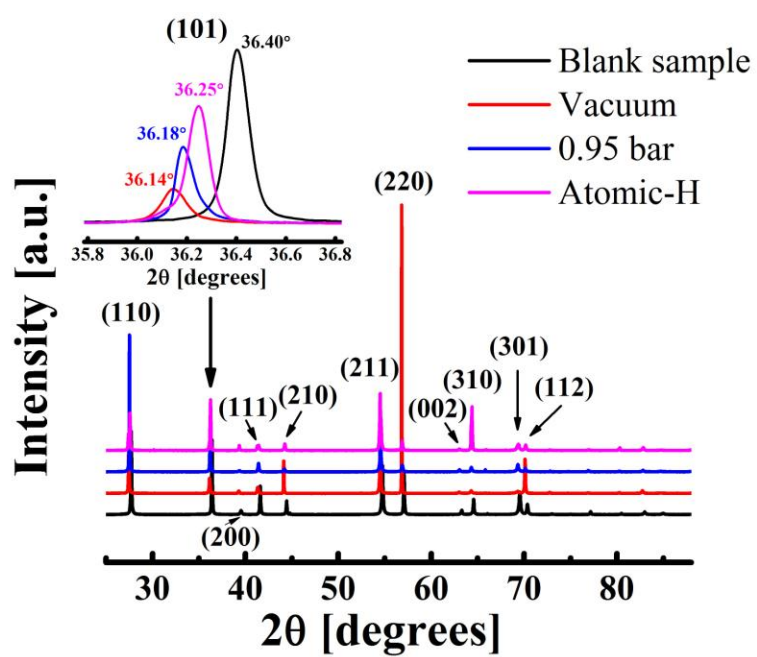

Fig. S3 Infrared absorption spectra of annealed TiO<sub>2</sub>.

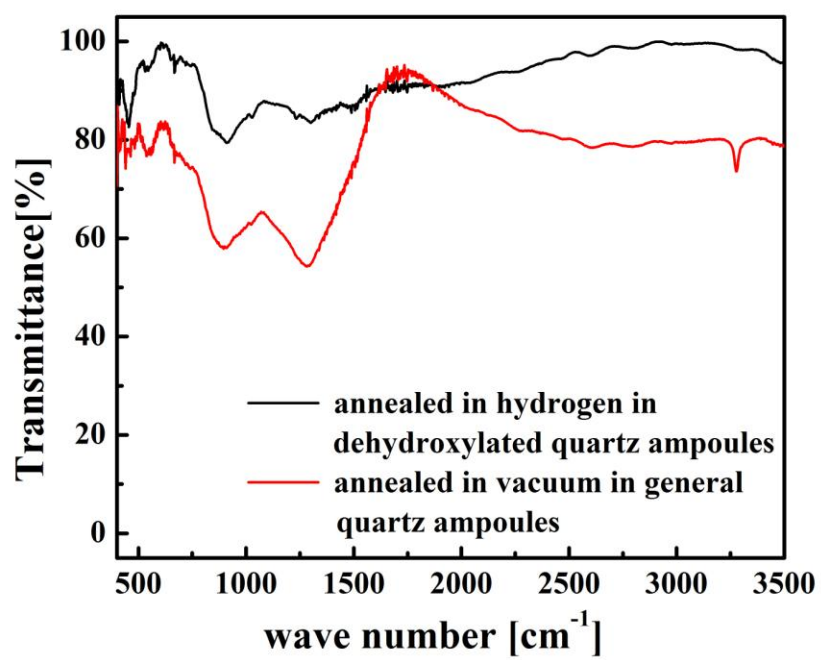

**Table I Bader analyses.**

| <b>Atom</b>           | <b>Bader charge</b> | <b>Distance</b> | <b>Atom</b>           | <b>Bader charge</b> | <b>Distance</b> |
|-----------------------|---------------------|-----------------|-----------------------|---------------------|-----------------|
| <b>Blank sample</b>   |                     |                 | <b>O<sub>4</sub></b>  | <b>7.0288</b>       | <b>0.8484</b>   |
| <b>O</b>              | <b>6.9767</b>       | <b>0.844</b>    | <b>Ti<sub>1</sub></b> | <b>2.0386</b>       | <b>0.8313</b>   |
| <b>Ti</b>             | <b>2.0453</b>       | <b>0.886</b>    | <b>Ti<sub>2</sub></b> | <b>2.0316</b>       | <b>0.8761</b>   |
| <b>Vo</b>             |                     |                 | <b>Ti<sub>3</sub></b> | <b>2.0390</b>       | <b>0.8326</b>   |
| <b>O<sub>1</sub></b>  | <b>7.0156</b>       | <b>0.8447</b>   | <b>Ti<sub>4</sub></b> | <b>2.0317</b>       | <b>0.8705</b>   |
| <b>O<sub>2</sub></b>  | <b>7.0156</b>       | <b>0.8774</b>   | <b>Ho</b>             |                     |                 |
| <b>O<sub>3</sub></b>  | <b>7.0156</b>       | <b>0.8405</b>   | <b>H</b>              | <b>1.5039</b>       | <b>0.7438</b>   |
| <b>Ti<sub>1</sub></b> | <b>2.0953</b>       | <b>0.8041</b>   | <b>O<sub>1</sub></b>  | <b>6.9946</b>       | <b>0.8447</b>   |
| <b>Ti<sub>2</sub></b> | <b>2.0953</b>       | <b>0.8041</b>   | <b>O<sub>2</sub></b>  | <b>6.9946</b>       | <b>0.8447</b>   |
| <b>Ti<sub>3</sub></b> | <b>2.0987</b>       | <b>0.8128</b>   | <b>O<sub>3</sub></b>  | <b>6.9874</b>       | <b>0.8412</b>   |
| <b>Hi</b>             |                     |                 | <b>O<sub>4</sub></b>  | <b>6.9875</b>       | <b>0.8412</b>   |
| <b>H</b>              | <b>0.3565</b>       | <b>0.0704</b>   | <b>Ti<sub>1</sub></b> | <b>2.0788</b>       | <b>0.8322</b>   |
| <b>O<sub>1</sub></b>  | <b>6.9981</b>       | <b>0.8248</b>   | <b>Ti<sub>2</sub></b> | <b>2.0787</b>       | <b>0.8312</b>   |
| <b>O<sub>2</sub></b>  | <b>7.1875</b>       | <b>0.7024</b>   | <b>Ti<sub>3</sub></b> | <b>2.0925</b>       | <b>0.8601</b>   |
| <b>O<sub>3</sub></b>  | <b>7.0013</b>       | <b>0.8284</b>   |                       |                     |                 |
